# Supplementary material
Source: PubMed Central journal article supplement (PMC3389972)
Supplement: supp_112.141036_141036SI.pdf [file supp_112.141036_141036SI.pdf]

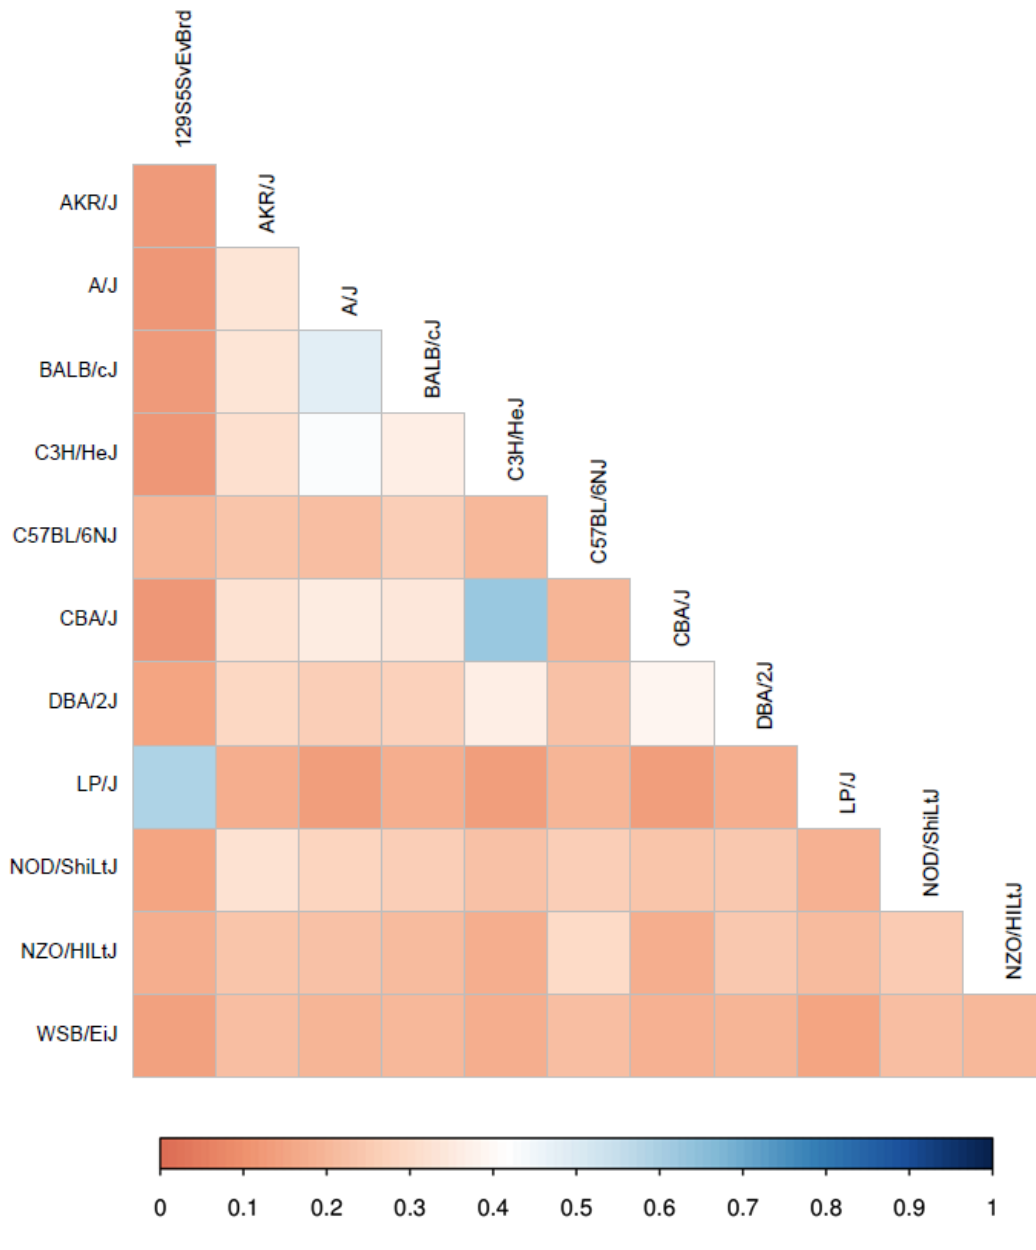

**Figure S1** Genetic correlations between the 12 inbred strains. The correlations (Pearson correlation  $r$ ) were calculated using a sample of 10% of all polymorphic SNPs. The legend bar shows the degree of correlation. The average correlation between strains is 0.2, with a range between 0.06 and 0.67.

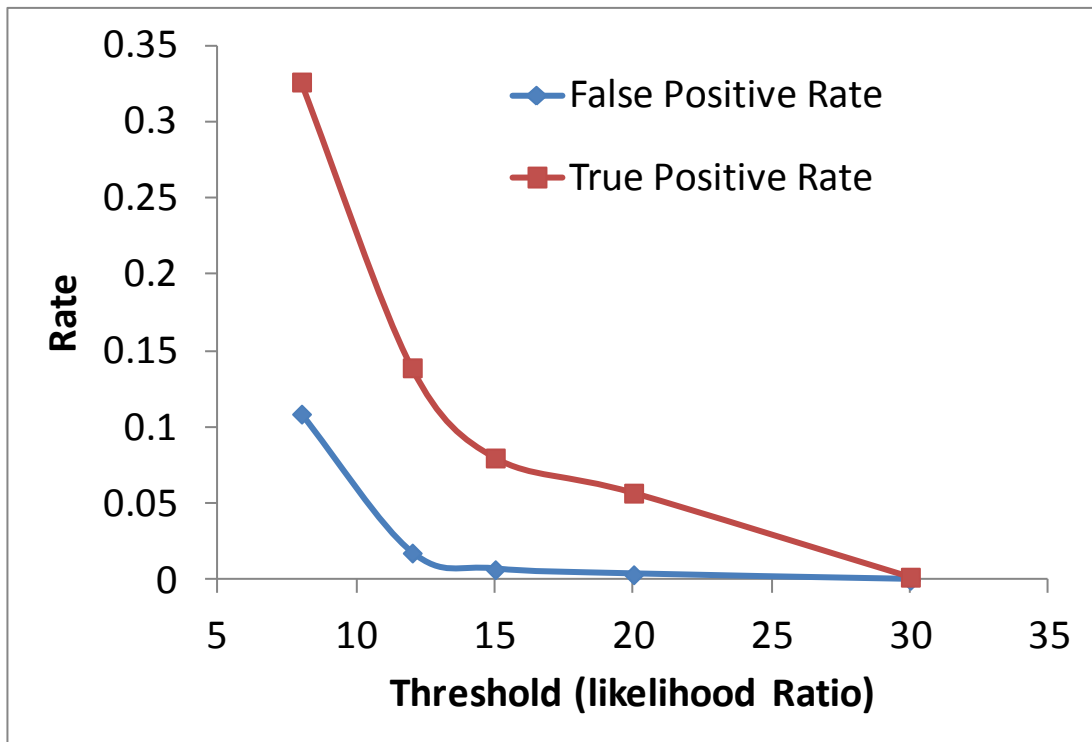

**Figure S2** Hotspots detection performance on a simulated sample of 12 inbred lines. False positive and true positive rate are reduced as a function of more stringent threshold to declare hotspots.

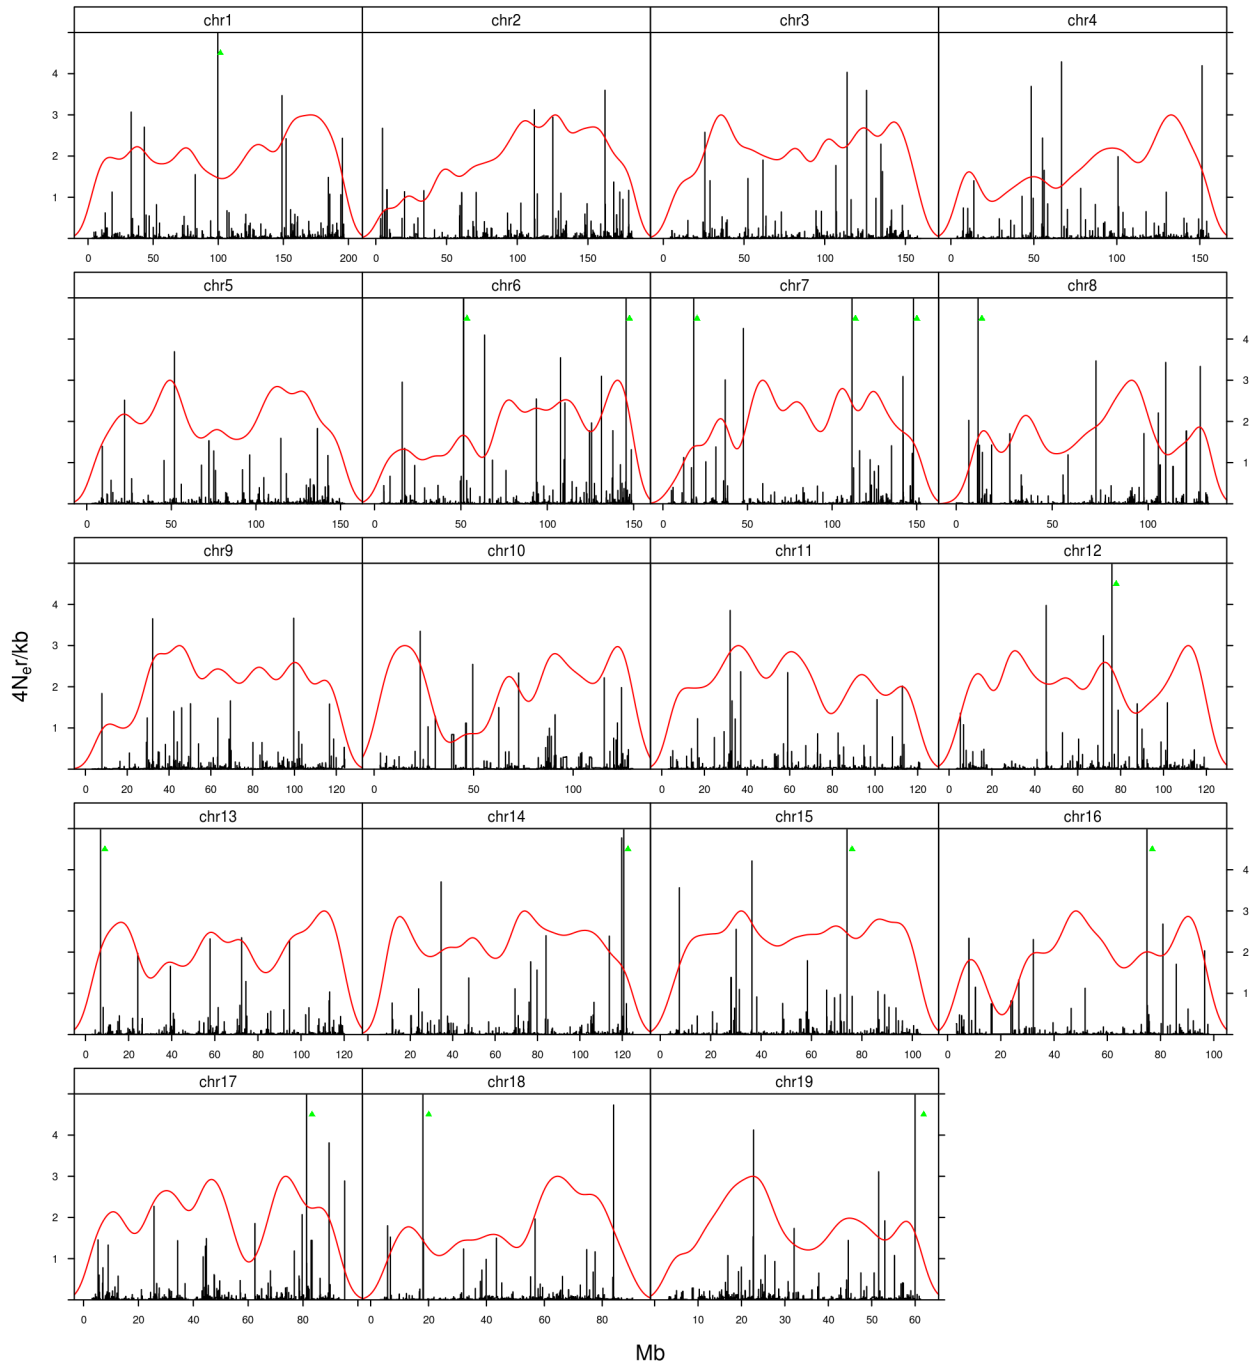

**Figure S3** Recombination rates and SNP density for each chromosome. Recombination rates in terms of  $4N_e r/kb$  are shown in black across each chromosome. Green triangles denote recombination rates which are higher than  $5 4N_e r/kb$  and are not fully shown for clarity purposes. The overlaying red line is the SNP density across the chromosome. The density of SNPs is approximately uniform in each chromosome.

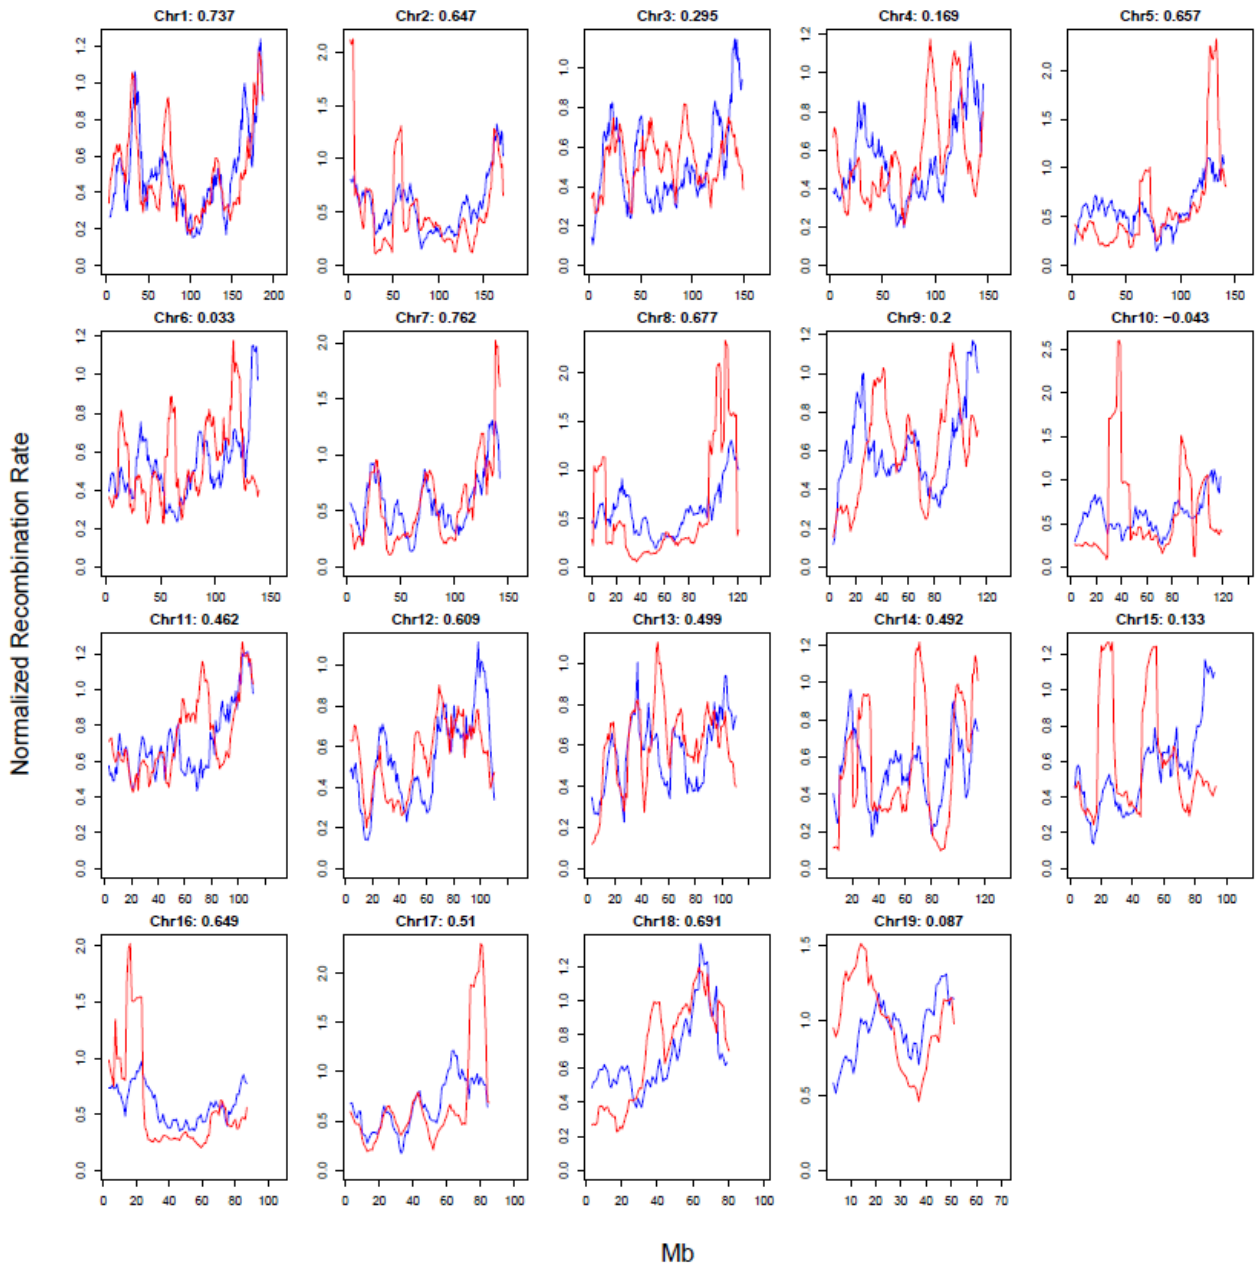

**Figure S4** Recombination rates for each chromosome estimated by LDhat (red lines) and based on Cox et al.<sup>S1</sup> genetic map (blue lines). Rates were smoothed over 10 Mb with a shift of 1 Mb. We scaled the the LDhat map according to the Cox et al. map and then recalculated recombination rates as  $(4N_e r)^{\text{scaled}}/\text{Mb}$  (see also Materials and methods).

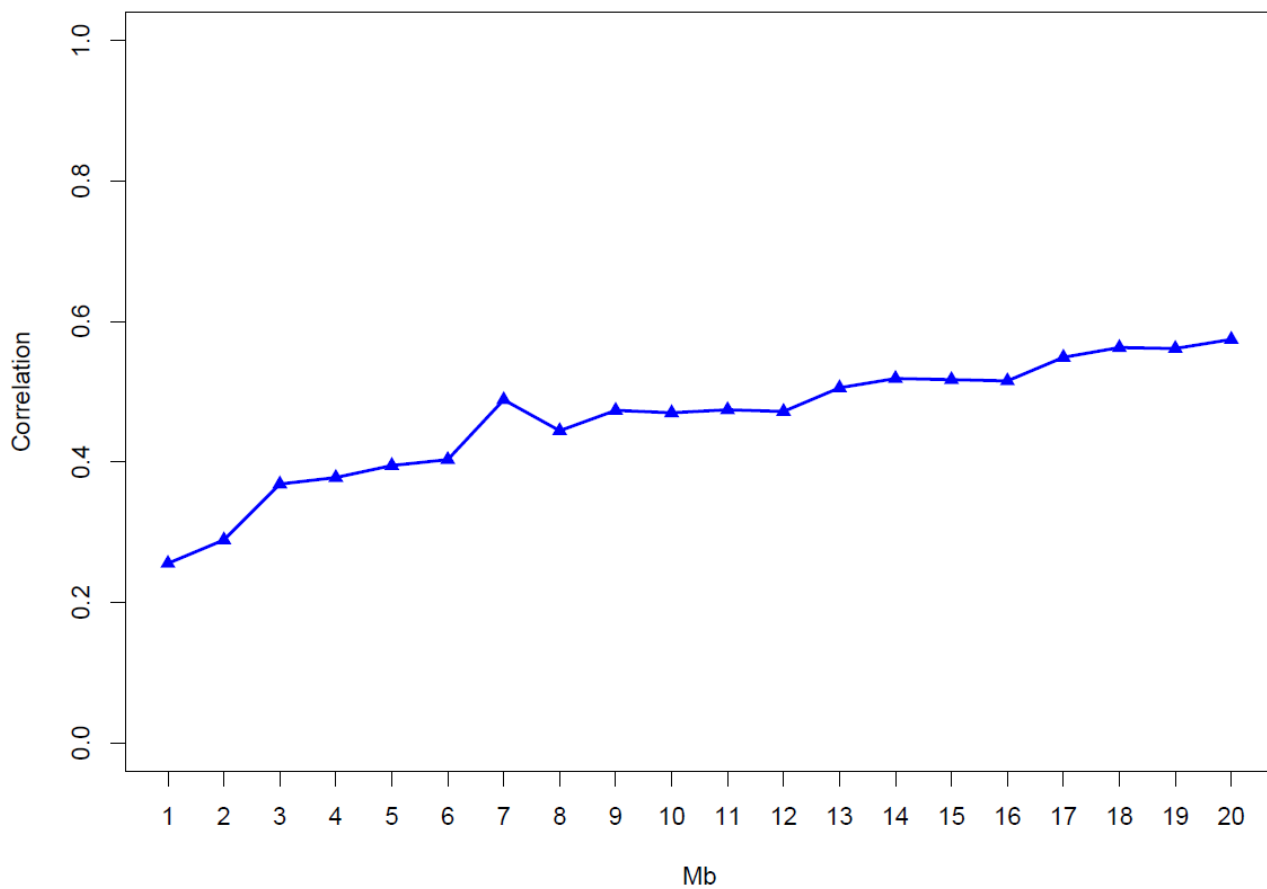

**Figure S5** Correlations of the recombination rates estimated from mouse crosses (Cox et al. <sup>S1</sup>) and rates estimated from mouse inbred strains genetic data. The correlations (y-axis) are shown as a function of the window size in Mb (x-axis). The correlations were calculated with different sizes of non-overlapping windows.

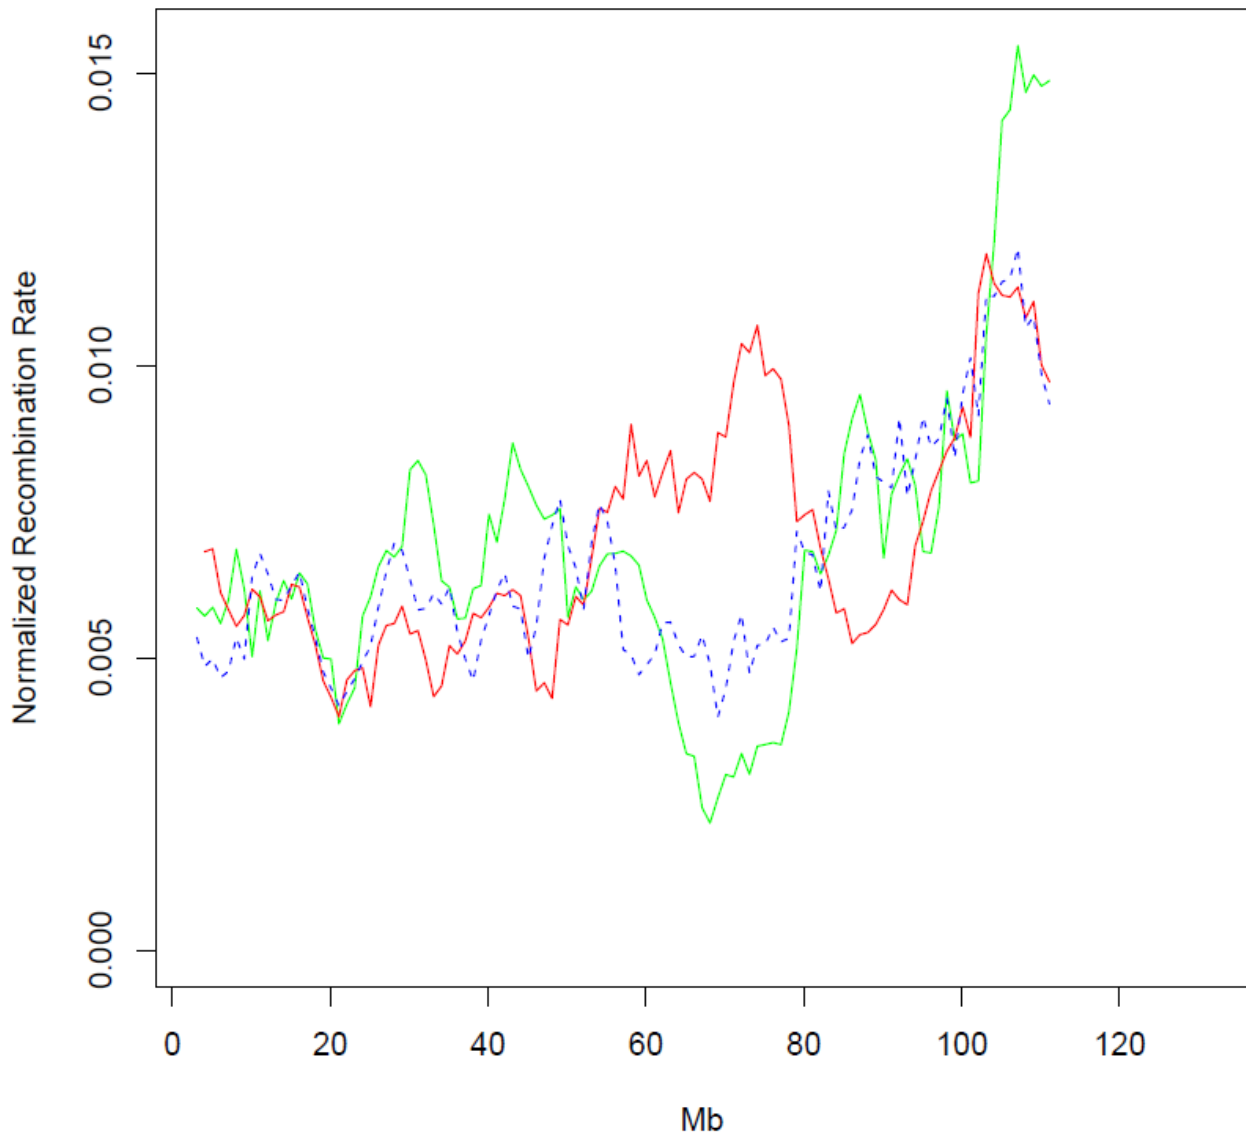

**Figure S6** Recombination rates estimated by LDhat (red) and based on Billings et al.<sup>S3</sup> (green). As a comparison we also included the Cox et al.<sup>S1</sup> genetic map (blue dashed line). Rates were smoothed over a window of 10 Mb with a shift of 1 Mb. It can be seen that all three maps have similarities at different positions (see also the correlations in Figure S5). The calculation of the normalized recombination rates is described in Materials and methods.

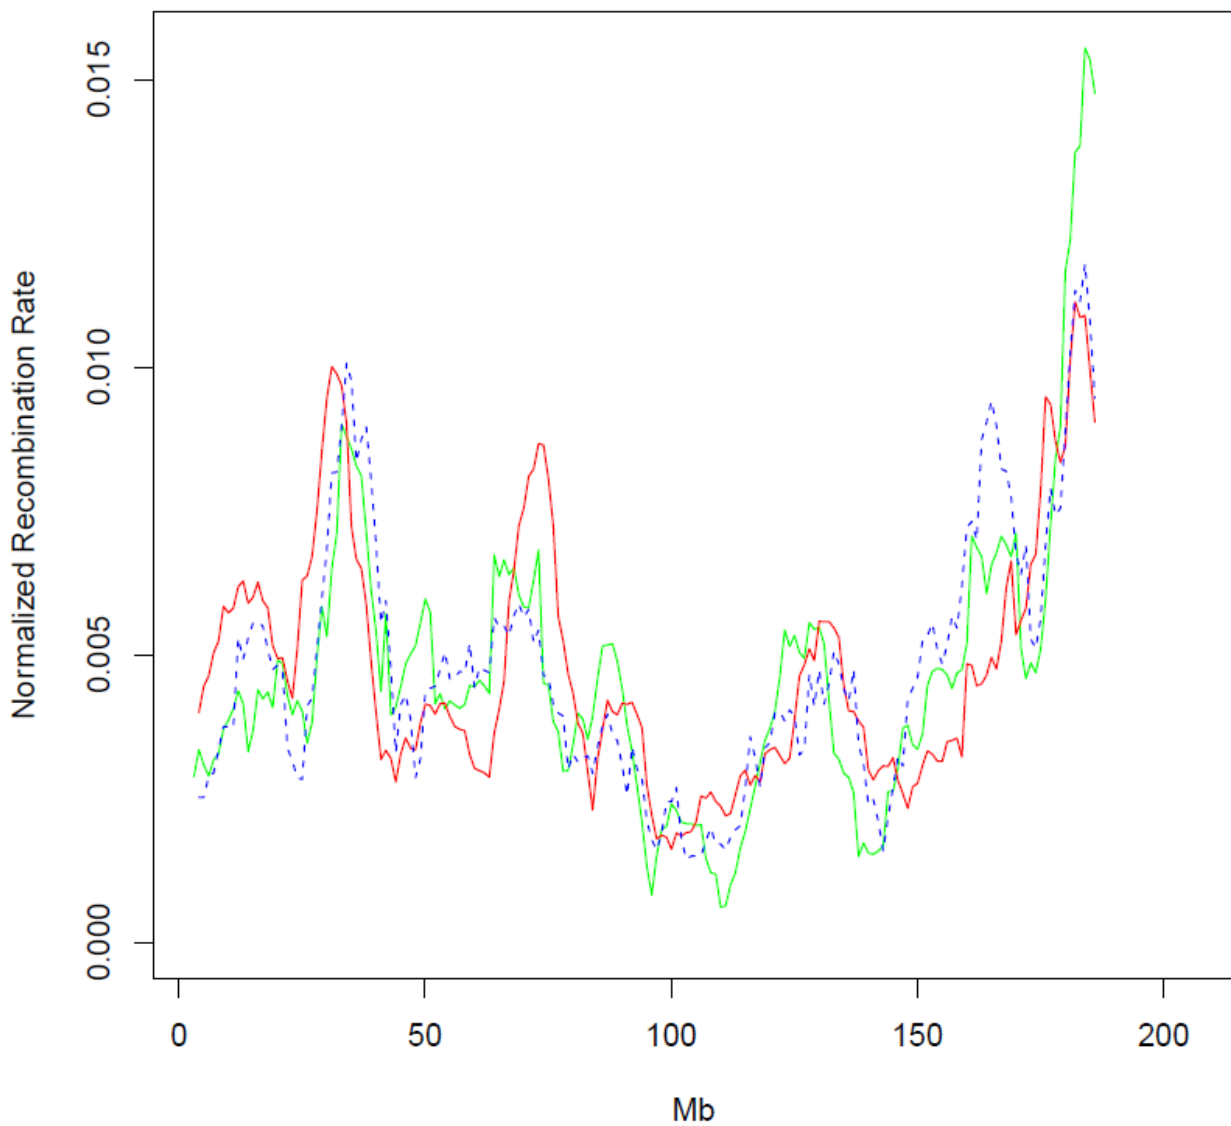

**Figure S7** Recombination rates estimated by LDhat (red) and based on Paigen et al.<sup>S2</sup> (green). As a comparison we also included the Cox et al.<sup>S1</sup> genetic map (blue dashed line). Rates were smoothed over a window of 10 Mb with a shift of 1 Mb. The three maps coincide well. The calculation of the normalized recombination rates is described in Materials and methods.

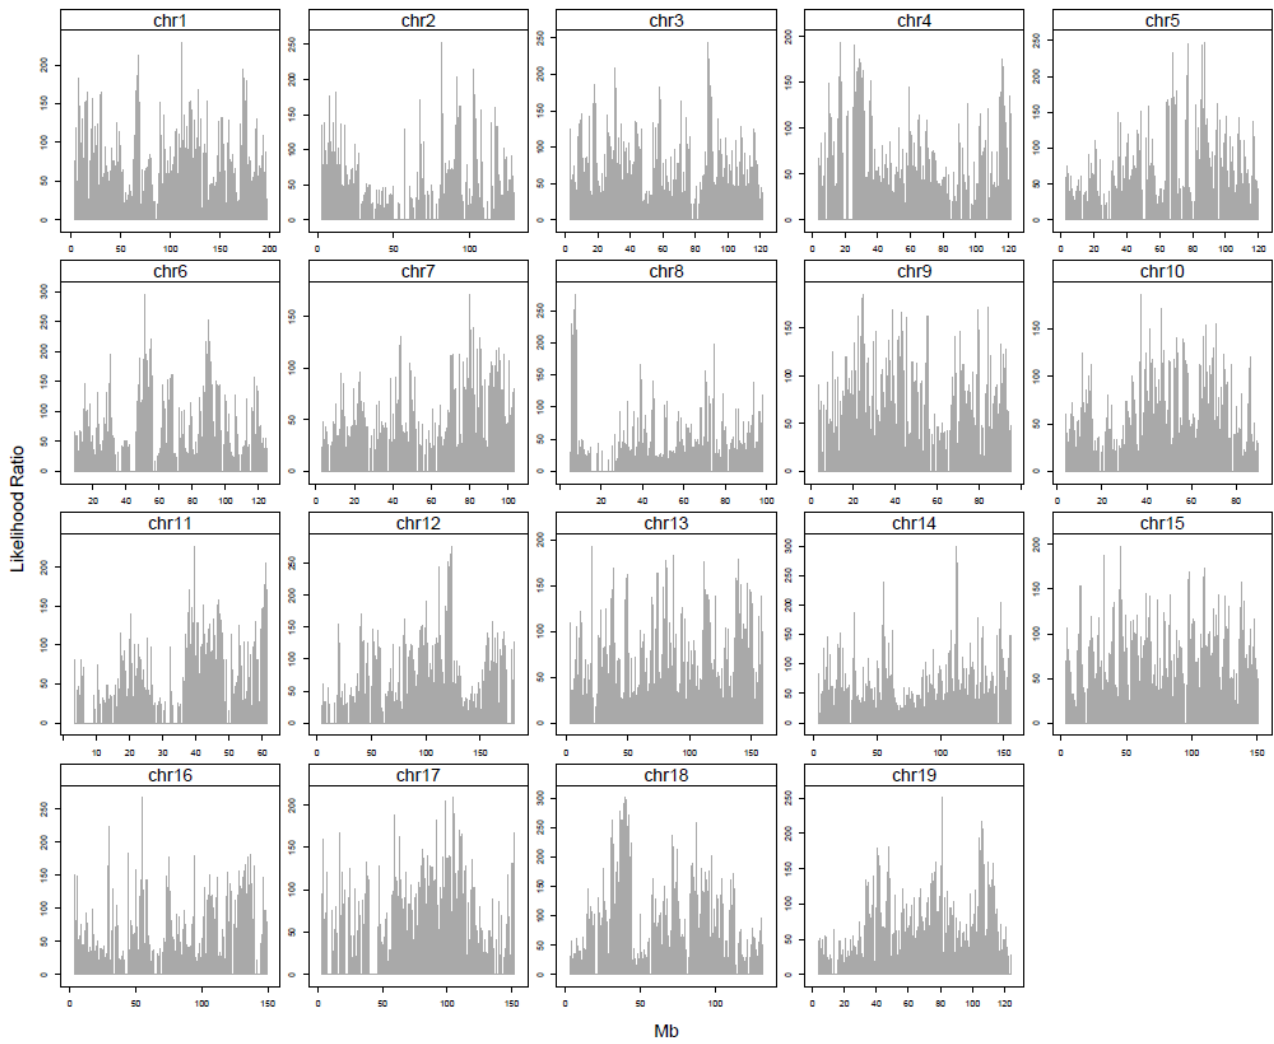

**Figure S8** Distribution of hotspots along chromosomes. Each vertical bar is a hotspot. The heights of the bars are the likelihood ratios, evidence of the existence of a hotspot as output by sequenceLDhot.



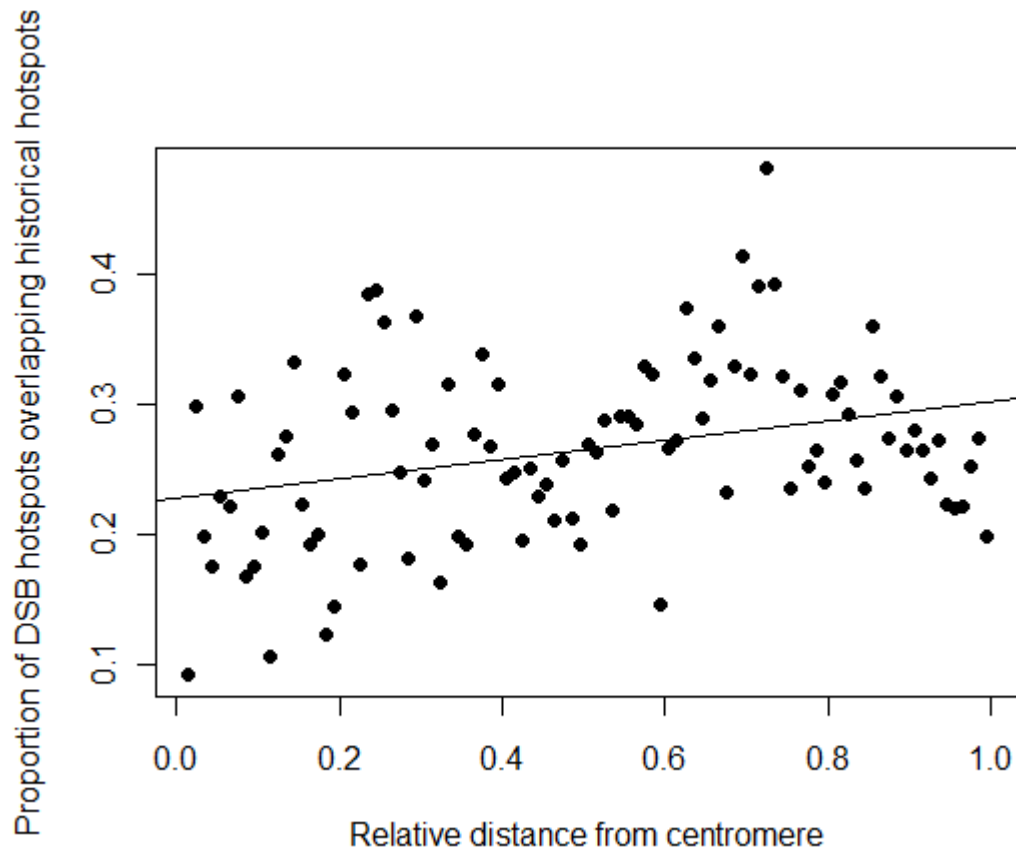

**Figure S9** The relationship between the relative distance from the centromere and the probability for DSB hotspots to overlapping historical hotspot. The relative distance from the centromere was calculated for each chromosome as the proportion of the chromosome length. DSB hotspots were divided into 100 bins based on the relative distance from the centromere.

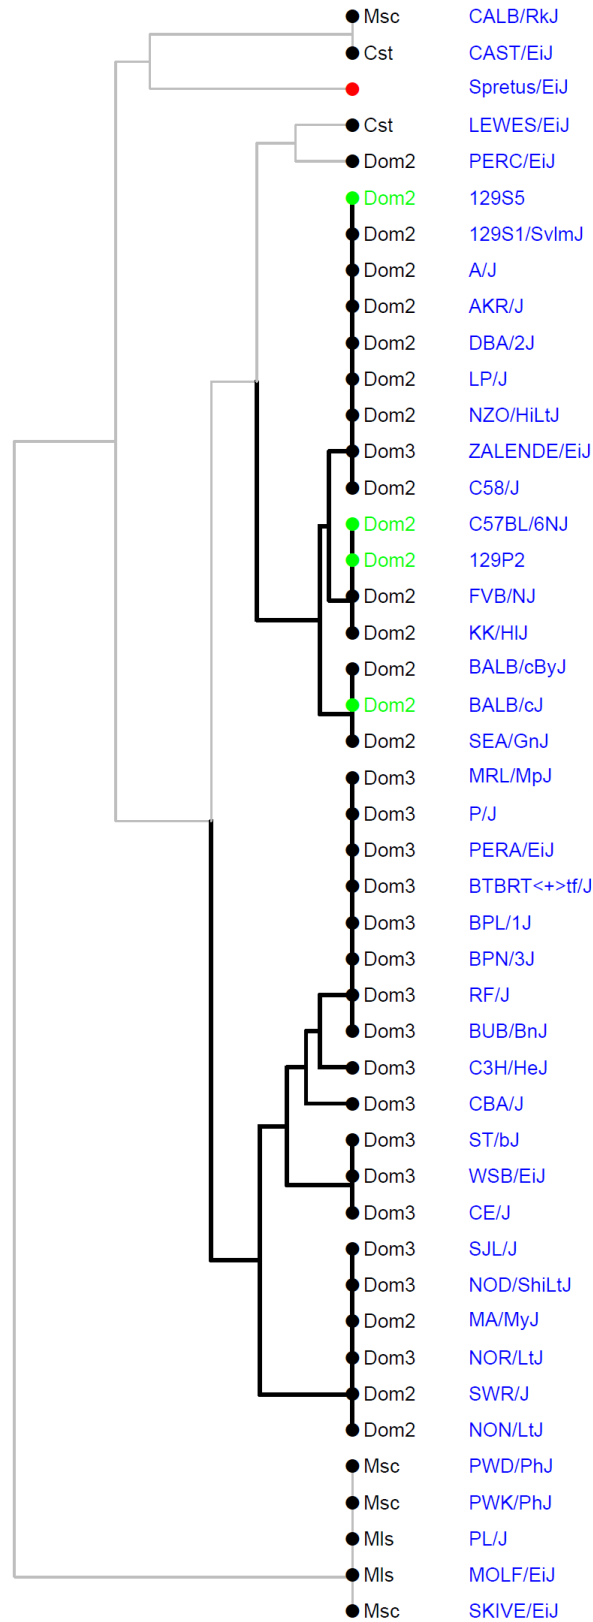

**Figure S10** *Prdm9* alleles in 95 mouse inbred strains (Cst, Dom2, Dom3, Msc, Mls). *Prdm9* alleles were genotyped or imputed using SNPs in a 5kb window surrounding the *Prdm9* gene. Next to each strain (names in blue) is the group assignment. The group assignments for strains which have been sequenced at *Prdm9* are shown in black. Imputed genotypes are shown in green. Imputation for one strain was unsuccessful (red bullet). The two largest clusters are Dom2 and Dom3 (shown in bold lines).

## **Tables S1 and S2**

### **Supporting Tables**

Tables S1 and S2 are available for download at <http://www.genetics.org/content/suppl/2012/05/04/genetics.112.141036.DC1> as .csv files.

**Table S3 Individual repeats and repeat families that are significantly enriched in hotspots.**

|                           | Hotspots | Coldspots | P-value* | Relative Risk |
|---------------------------|----------|-----------|----------|---------------|
| <b>Repeat Family</b>      |          |           |          |               |
| Simple_repeat             | 20025    | 18157     | 6.33E-20 | 1.103         |
| Low_complexity            | 10146    | 9562      | 0.00171  | 1.061         |
| L1                        | 12842    | 12285     | 0.0235   | 1.045         |
| <b>Individual Repeats</b> |          |           |          |               |
| L1Md_F2                   | 1739     | 1138      | 3.35E-26 | 1.528         |
| MTA_Mm                    | 616      | 366       | 1.52E-12 | 1.683         |
| L1Md_T                    | 501      | 290       | 6.55E-11 | 1.728         |
| GC_rich                   | 335      | 186       | 7.45E-08 | 1.801         |
| GA-rich                   | 1757     | 1399      | 2.23E-07 | 1.256         |
| L1Md_F3                   | 453      | 291       | 3.48E-06 | 1.557         |
| L1Md_A                    | 350      | 211       | 5.31E-06 | 1.659         |
| MTA_Mm-int                | 122      | 51        | 7.58E-05 | 2.392         |
| L1_Mus1                   | 794      | 595       | 0.000115 | 1.334         |
| L1Md_F                    | 128      | 62        | 0.00214  | 2.065         |
| B1_Mus2                   | 2520     | 2202      | 0.00439  | 1.144         |
| <b>Simple Repeats</b>     |          |           |          |               |
| (GA)n                     | 2942     | 1780      | 1.24E-61 | 1.653         |
| (TC)n                     | 2858     | 1764      | 1.20E-55 | 1.62          |
| (TA)n                     | 2916     | 1829      | 1.98E-53 | 1.594         |
| (CA)n                     | 5986     | 5114      | 1.48E-13 | 1.171         |
| (GAAA)n                   | 715      | 452       | 1.50E-11 | 1.582         |
| (TG)n                     | 5961     | 5153      | 2.10E-11 | 1.157         |
| (T)n                      | 1283     | 948       | 1.56E-09 | 1.353         |
| (TTTC)n                   | 672      | 442       | 6.44E-09 | 1.52          |
| (A)n                      | 1302     | 977       | 1.18E-08 | 1.333         |
| (GGAA)n                   | 434      | 272       | 1.3E-06  | 1.596         |
| (TCTA)n                   | 660      | 467       | 0.000011 | 1.413         |
| (GAA)n                    | 304      | 189       | 0.00028  | 1.608         |
| (TTTTTC)n                 | 234      | 137       | 0.000603 | 1.708         |

\*P-value corrected using Bonferroni correction

**Table S4 List of strains from different sources and their known Prdm9 alleles.**

| Original 17  | Sequenced in this study | Sequenced by Parvanov <sup>S4</sup> | Combined |
|--------------|-------------------------|-------------------------------------|----------|
| 129P2/OlaHsd |                         |                                     | NA       |
| 129S1/SvlmJ  |                         | 129S1/SvlmJ                         | Dom2     |
| 129S5SvEvBrd |                         |                                     | NA       |
| A/J          |                         | A/J                                 | Dom2     |
| AKR/J        |                         | AKR/J                               | Dom2     |
| BALB/cJ      |                         |                                     | NA       |
| C3H/HeJ      |                         | C3H/HeJ                             | Dom3     |
| C57BL/6NJ    |                         |                                     | NA       |
| CAST/EiJ     |                         | CAST/EiJ                            | Cst      |
| CBA/J        | CBA/J                   | CBA/CaJ                             | Dom3     |
| DBA/J        | DBA/2J                  | DBA/2J                              | Dom2     |
| LP/J         | LP/J                    |                                     | Dom2     |
| NOD/ShiLtJ   | NOD/LtJ                 | NOD/LtJ                             | Dom3     |
| NZO/HILtJ    | NZO/HILtJ               | NZO/HILtJ                           | Dom2     |
| PWK/PhJ      |                         | PWK/PhJ                             | Msc      |
| SPRET/EiJ    |                         |                                     | NA       |
| WSB/EiJ      |                         | WSB/EiJ                             | Dom3     |
|              | SJL/J                   |                                     | Dom3     |
|              | CALB/RkJ                |                                     | Msc      |
|              | ST/bJ                   |                                     | Dom3     |
|              | P/J                     |                                     | Dom3     |
|              | PERC/EiJ                |                                     | Dom2     |
|              | CE/J                    |                                     | Dom3     |
|              | MRL/MpJ                 |                                     | Dom3     |
|              | PERA/EiJ                | PERA/EiJ                            | Dom3     |
|              | ZALENDE/EiJ             |                                     | Dom3     |
|              | BTBRT<+>tf/J            |                                     | Dom3     |
|              | C58/J                   |                                     | Dom2     |
|              | BPL/1J                  |                                     | Dom3     |
|              | BPN/3J                  |                                     | Dom3     |
|              | PL/J                    |                                     | Mls      |
|              | MA/MyJ                  |                                     | Dom2     |
|              | RF/J                    |                                     | Dom3     |
|              | FVB/NJ                  | FVB/NJ                              | Dom2     |
|              | SKIVE/EiJ               | SKIVE/EiJ                           | Msc      |
|              | KK/HiJ                  | KK/HiJ                              | Dom2     |
|              | NOR/LtJ                 |                                     | Dom3     |
|              | SWR/J                   |                                     | Dom2     |
|              | NON/LtJ                 |                                     | Dom2     |
|              | LEWES/EiJ               |                                     | Cst      |
|              | SEA/GnJ                 |                                     | Dom2     |
|              | BuB/BnJ                 |                                     | Dom3     |
|              |                         | PWD/PhJ                             | Msc      |
|              |                         | BALB/cByJ                           | Dom2     |
|              |                         | MOLF/EiJ                            | Mls      |

NA = Unkown Prdm9 allele

#### SUPPORTING REFERENCES

- S1. Cox A. et al., *Genetics* **182**, 1335-1344 (2009).
- S2. Paigen K. et al., *PLoS Biology* **7**(2), 340-349 (2009).
- S3. Billings T. et al., *PLoS One* **5**(12), e15340 (2010).
- S4. Parvanov, E.D., P.M. Petkov, and K. Paigen. *Science* **327**: 835 (2010).
