# Supplementary material
Source: PubMed Central journal article supplement (PMC3389972)
Supplement: supp_112.141036_FigureS1.pdf [file supp_112.141036_FigureS1.pdf]

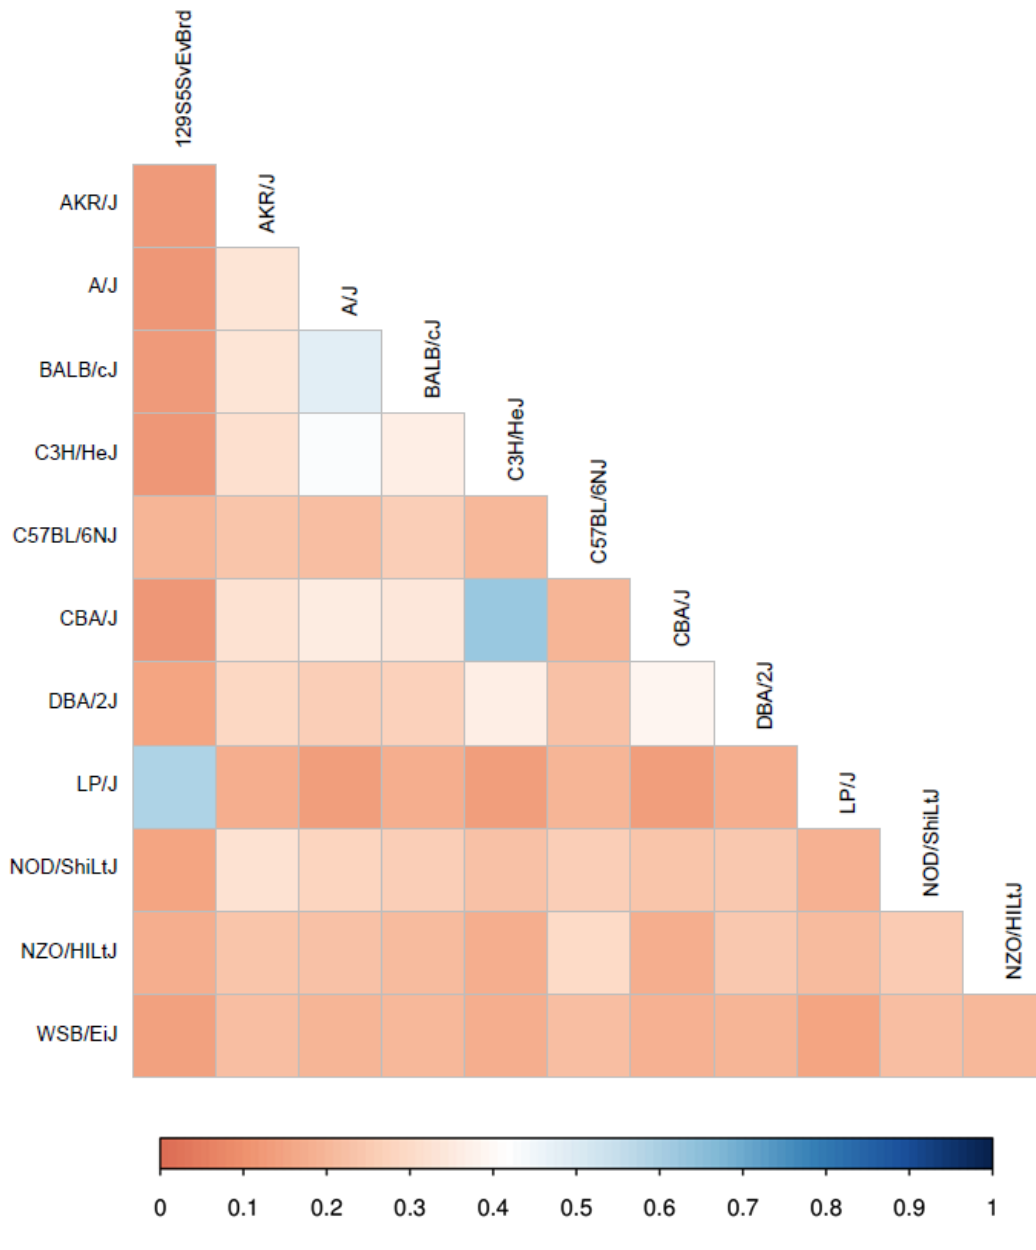

**Figure S1** Genetic correlations between the 12 inbred strains. The correlations (Pearson correlation  $r$ ) were calculated using a sample of 10% of all polymorphic SNPs. The legend bar shows the degree of correlation. The average correlation between strains is 0.2, with a range between 0.06 and 0.67.
