# Supplementary material
Source: PubMed Central journal article supplement (PMC3389972)
Supplement: supp_112.141036_FigureS2.pdf [file supp_112.141036_FigureS2.pdf]

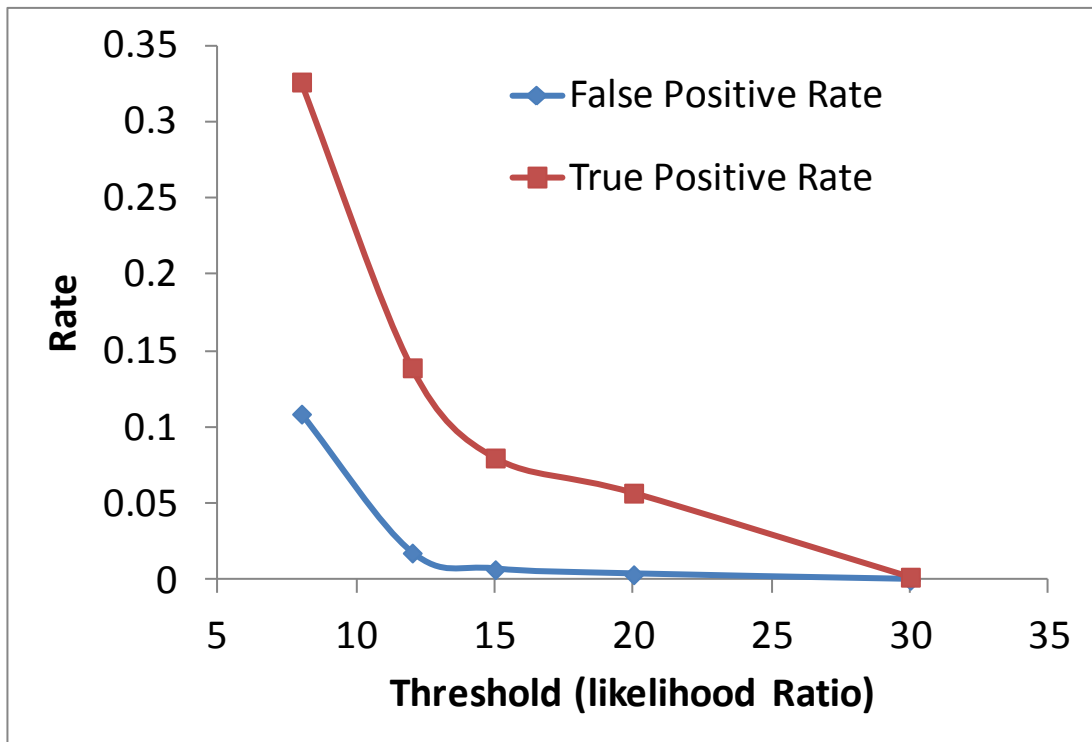

**Figure S2** Hotspots detection performance on a simulated sample of 12 inbred lines. False positive and true positive rate are reduced as a function of more stringent threshold to declare hotspots.
