# Supplementary material
Source: PubMed Central journal article supplement (PMC3389972)
Supplement: supp_112.141036_FigureS3.pdf [file supp_112.141036_FigureS3.pdf]

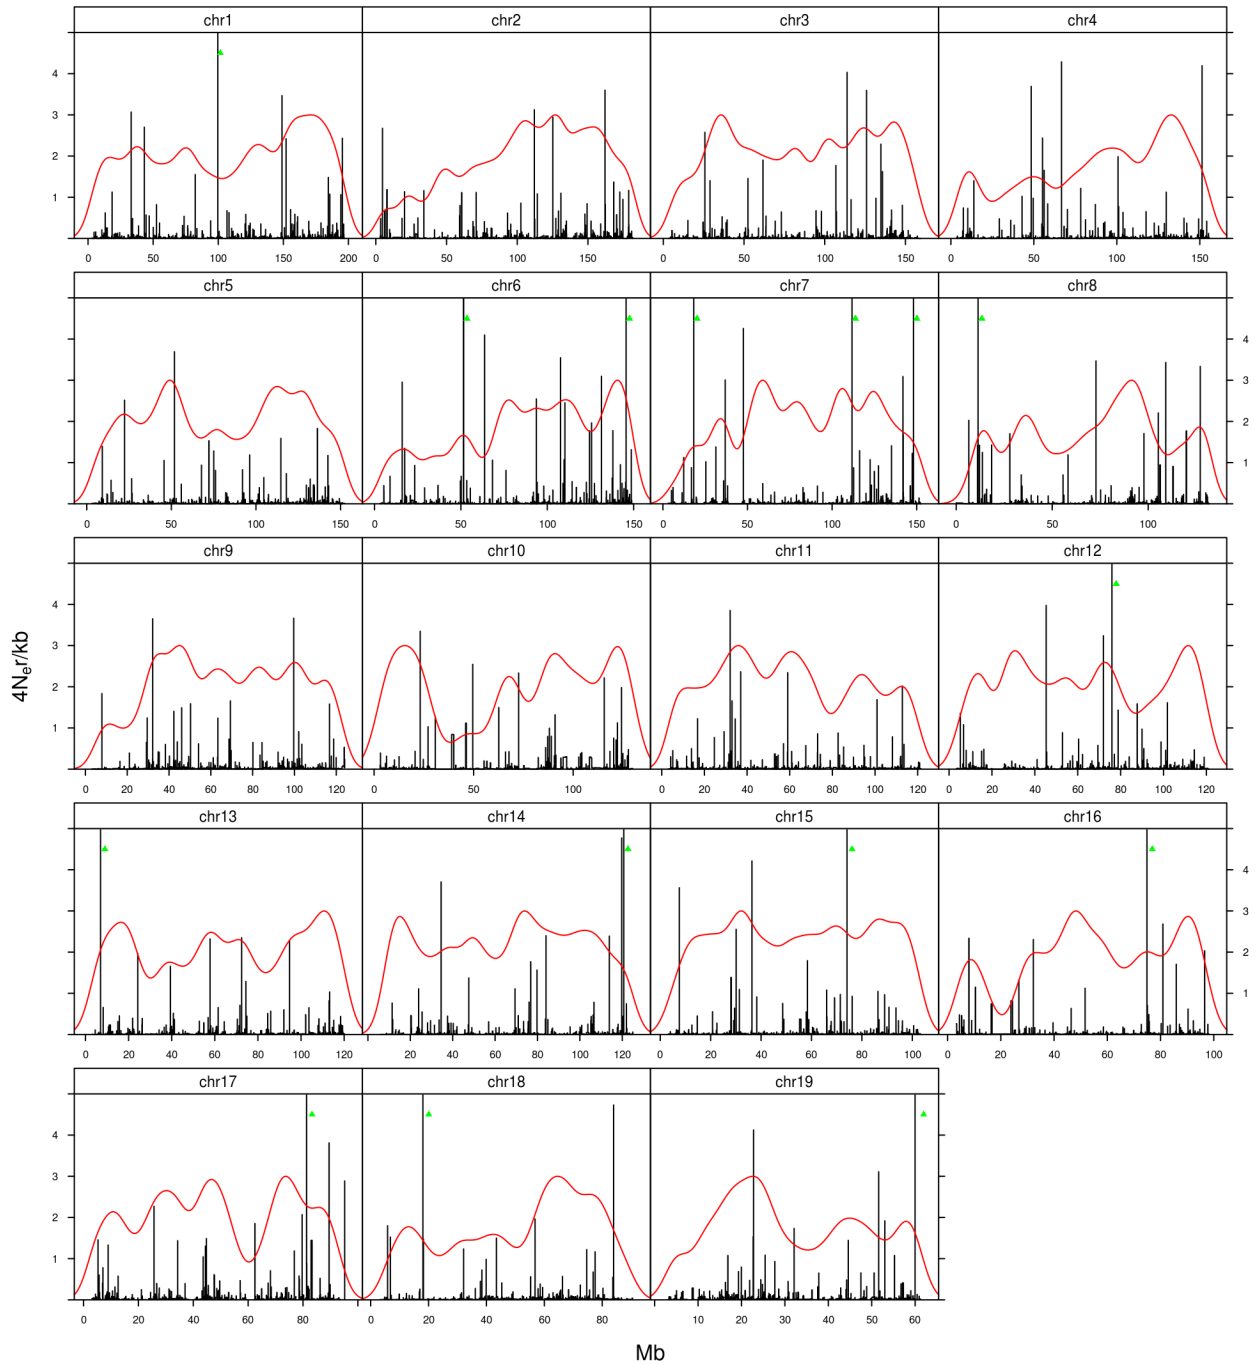

**Figure S3** Recombination rates and SNP density for each chromosome. Recombination rates in terms of  $4N_e r/kb$  are shown in black across each chromosome. Green triangles denote recombination rates which are higher than  $5 4N_e r/kb$  and are not fully shown for clarity purposes. The overlaying red line is the SNP density across the chromosome. The density of SNPs is approximately uniform in each chromosome.
