# Supplementary material
Source: PubMed Central journal article supplement (PMC3389972)
Supplement: supp_112.141036_FigureS4.pdf [file supp_112.141036_FigureS4.pdf]

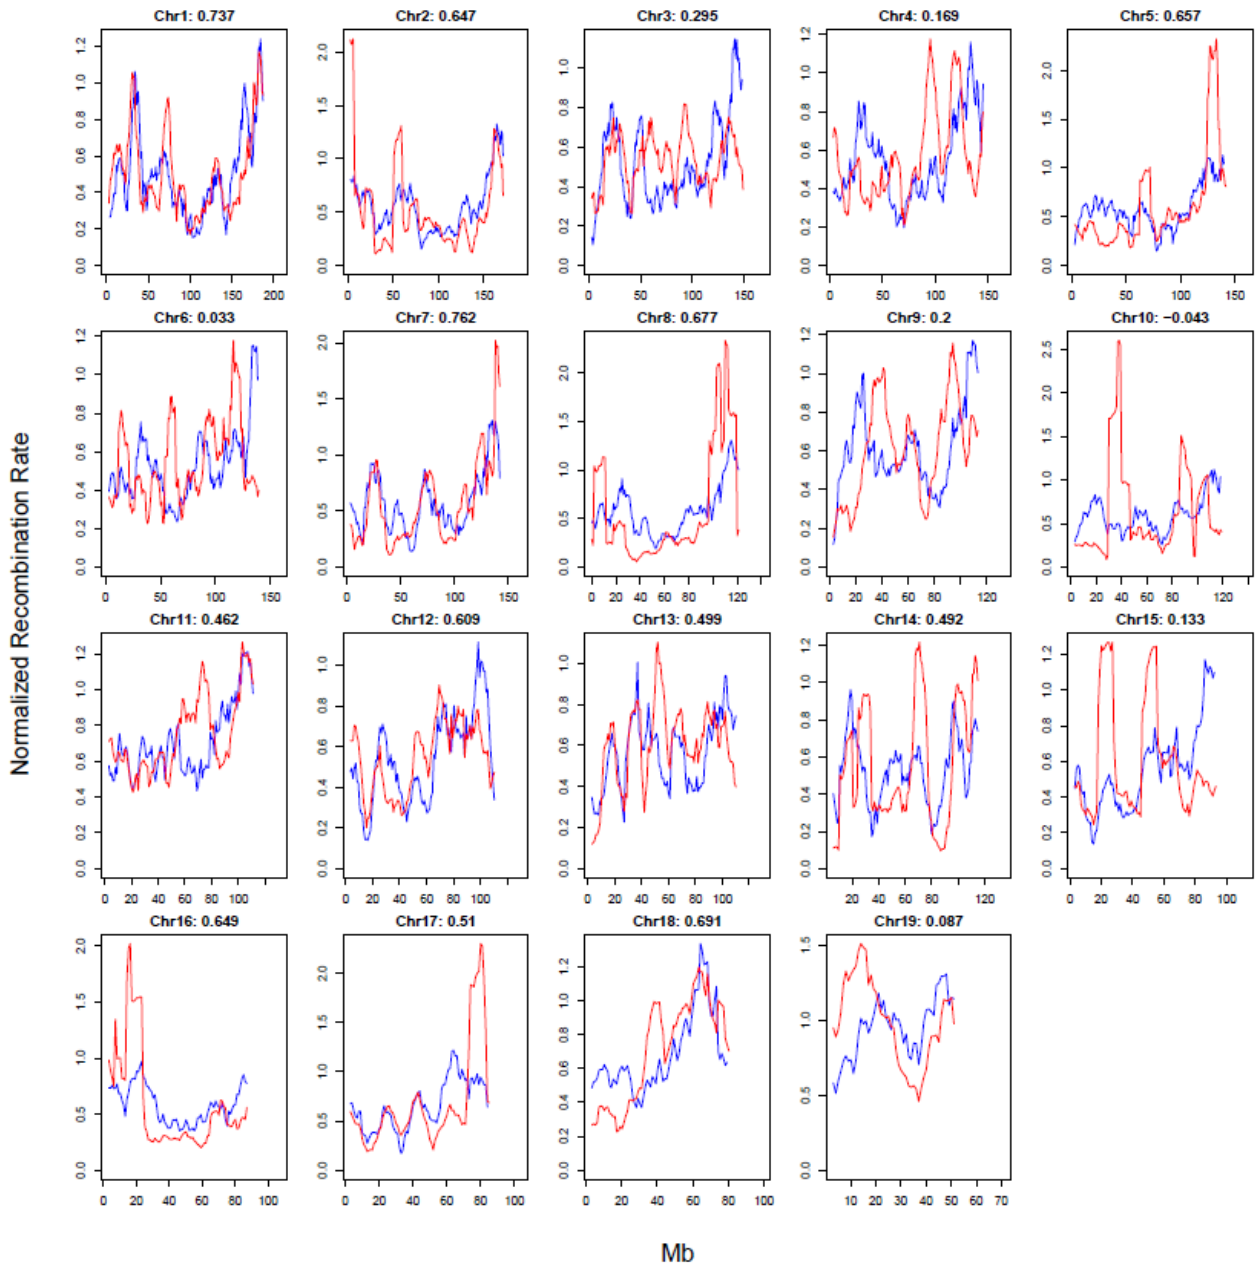

**Figure S4** Recombination rates for each chromosome estimated by LDhat (red lines) and based on Cox et al.<sup>S1</sup> genetic map (blue lines). Rates were smoothed over 10 Mb with a shift of 1 Mb. We scaled the the LDhat map according to the Cox et al. map and then recalculated recombination rates as  $(4N_e r)^{scaled}/Mb$  (see also Materials and methods).
