# Supplementary material
Source: PubMed Central journal article supplement (PMC3389972)
Supplement: supp_112.141036_FigureS5.pdf [file supp_112.141036_FigureS5.pdf]

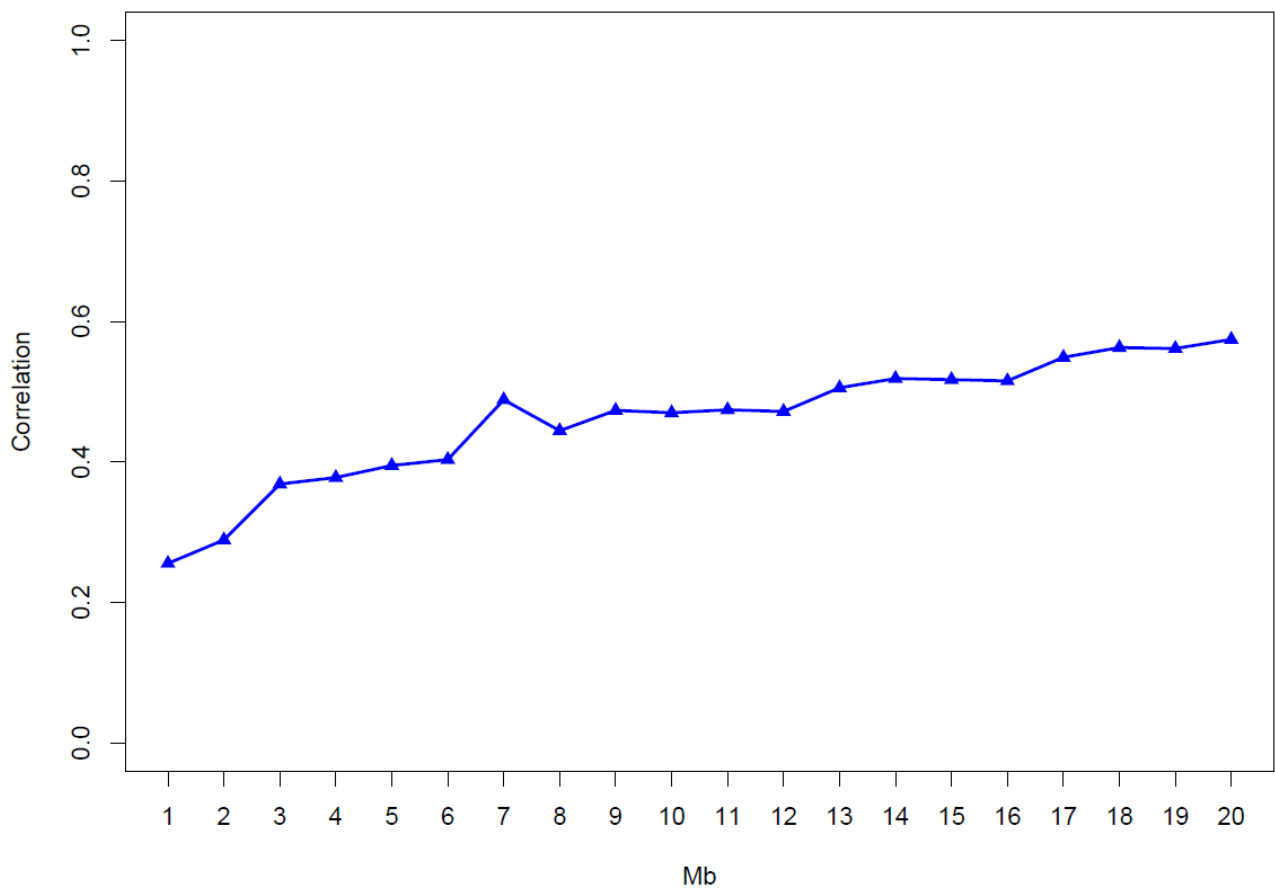

**Figure S5** Correlations of the recombination rates estimated from mouse crosses (Cox et al. <sup>S1</sup>) and rates estimated from mouse inbred strains genetic data. The correlations (y-axis) are shown as a function of the window size in Mb (x-axis). The correlations were calculated with different sizes of non-overlapping windows.
