# Supplementary material
Source: PubMed Central journal article supplement (PMC3389972)
Supplement: supp_112.141036_FigureS6.pdf [file supp_112.141036_FigureS6.pdf]

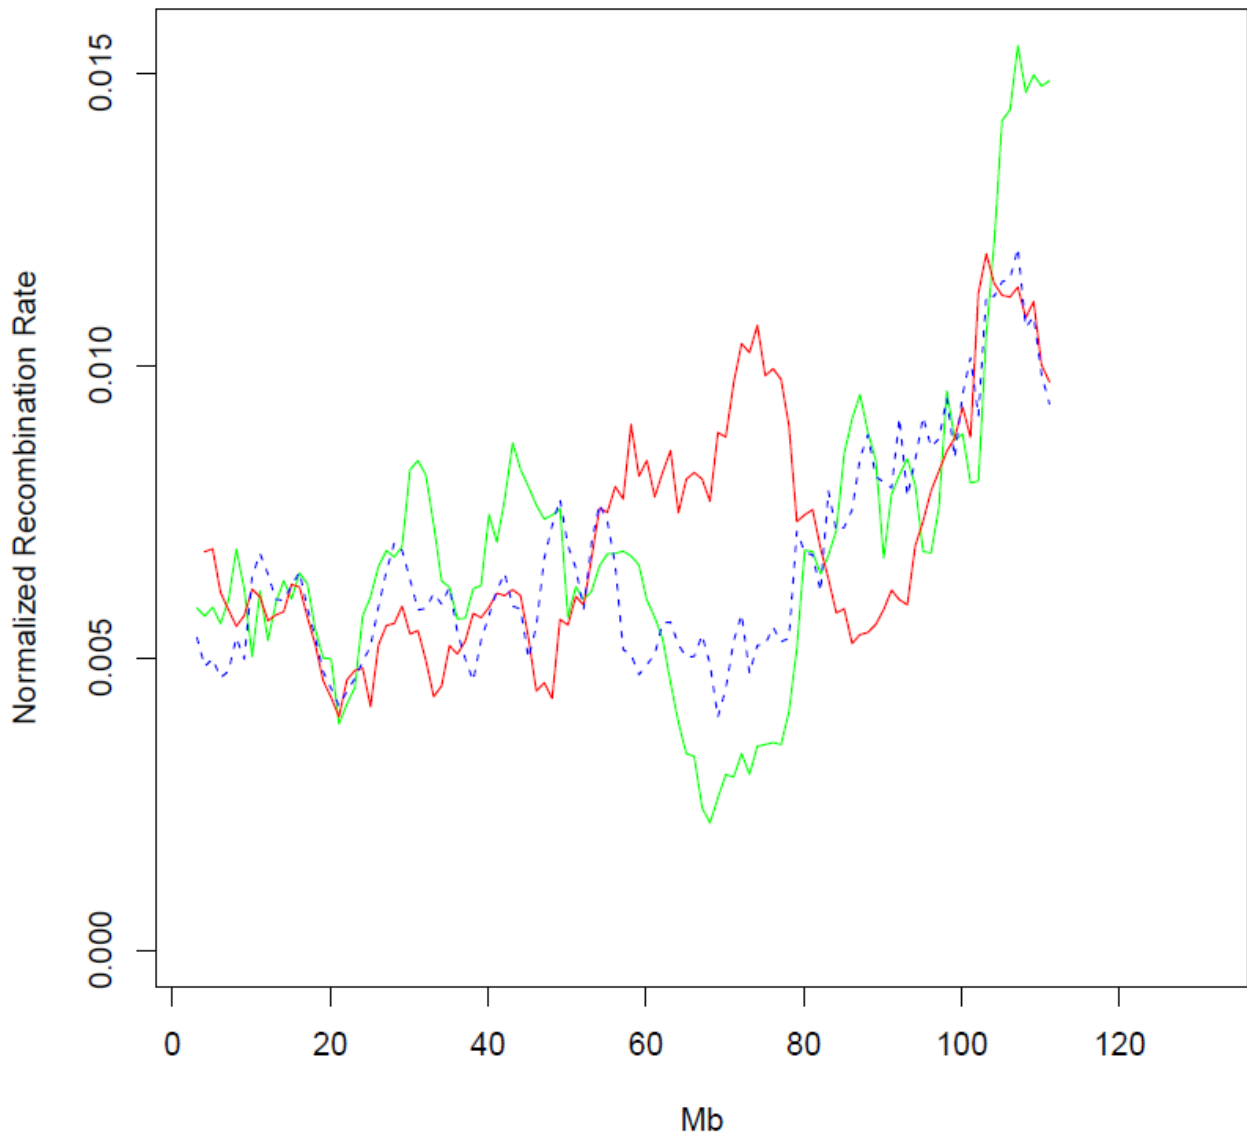

**Figure S6** Recombination rates estimated by LDhat (red) and based on Billings et al.<sup>S3</sup> (green). As a comparison we also included the Cox et al.<sup>S1</sup> genetic map (blue dashed line). Rates were smoothed over a window of 10 Mb with a shift of 1 Mb. It can be seen that all three maps have similarities at different positions (see also the correlations in Figure S5). The calculation of the normalized recombination rates is described in Materials and methods.
