# Supplementary material
Source: PubMed Central journal article supplement (PMC3389972)
Supplement: supp_112.141036_FigureS7.pdf [file supp_112.141036_FigureS7.pdf]

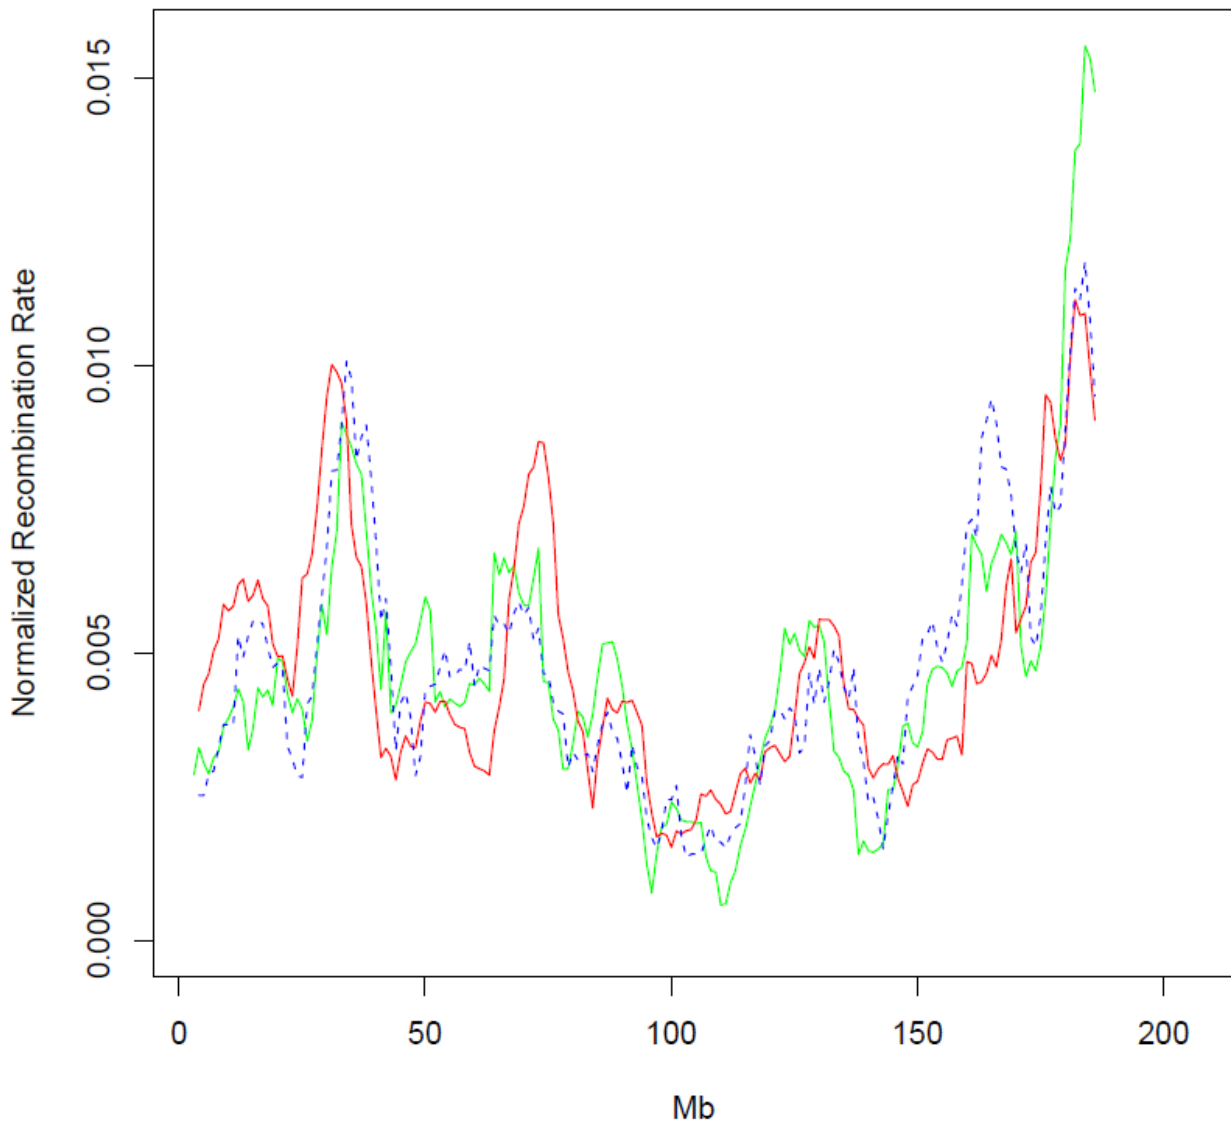

**Figure S7** Recombination rates estimated by LDhat (red) and based on Paigen et al.<sup>S2</sup> (green). As a comparison we also included the Cox et al.<sup>S1</sup> genetic map (blue dashed line). Rates were smoothed over a window of 10 Mb with a shift of 1 Mb. The three maps coincide well. The calculation of the normalized recombination rates is described in Materials and methods.
