# Supplementary material
Source: PubMed Central journal article supplement (PMC3389972)
Supplement: supp_112.141036_FigureS8.pdf [file supp_112.141036_FigureS8.pdf]

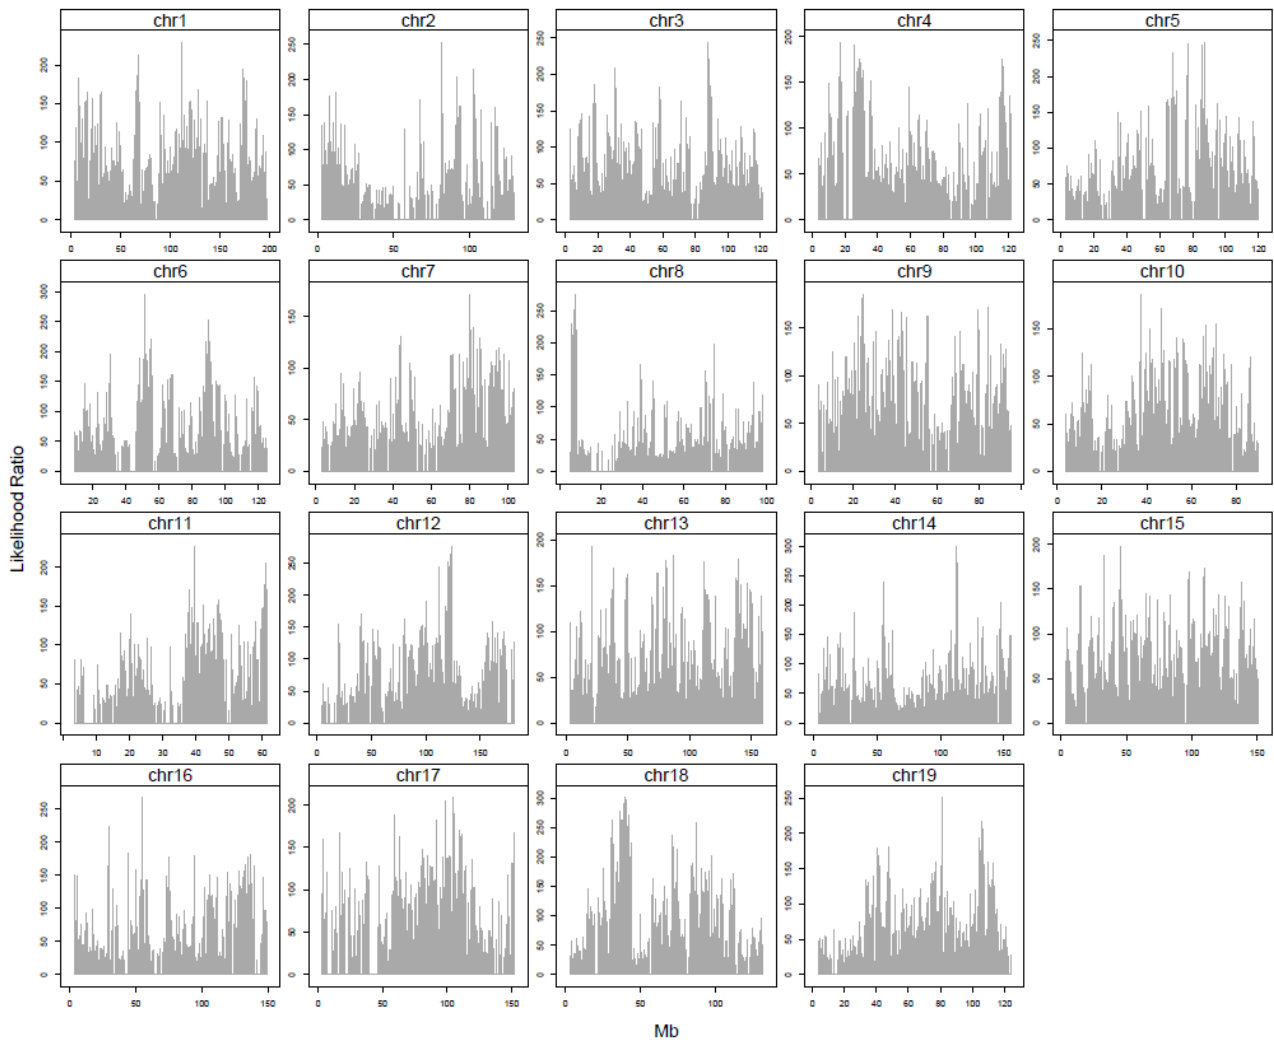

**Figure S8** Distribution of hotspots along chromosomes. Each vertical bar is a hotspot. The heights of the bars are the likelihood ratios, evidence of the existence of a hotspot as output by sequenceLDhot.
