# Supplementary material
Source: PubMed Central journal article supplement (PMC3389972)
Supplement: supp_112.141036_FigureS9.pdf [file supp_112.141036_FigureS9.pdf]

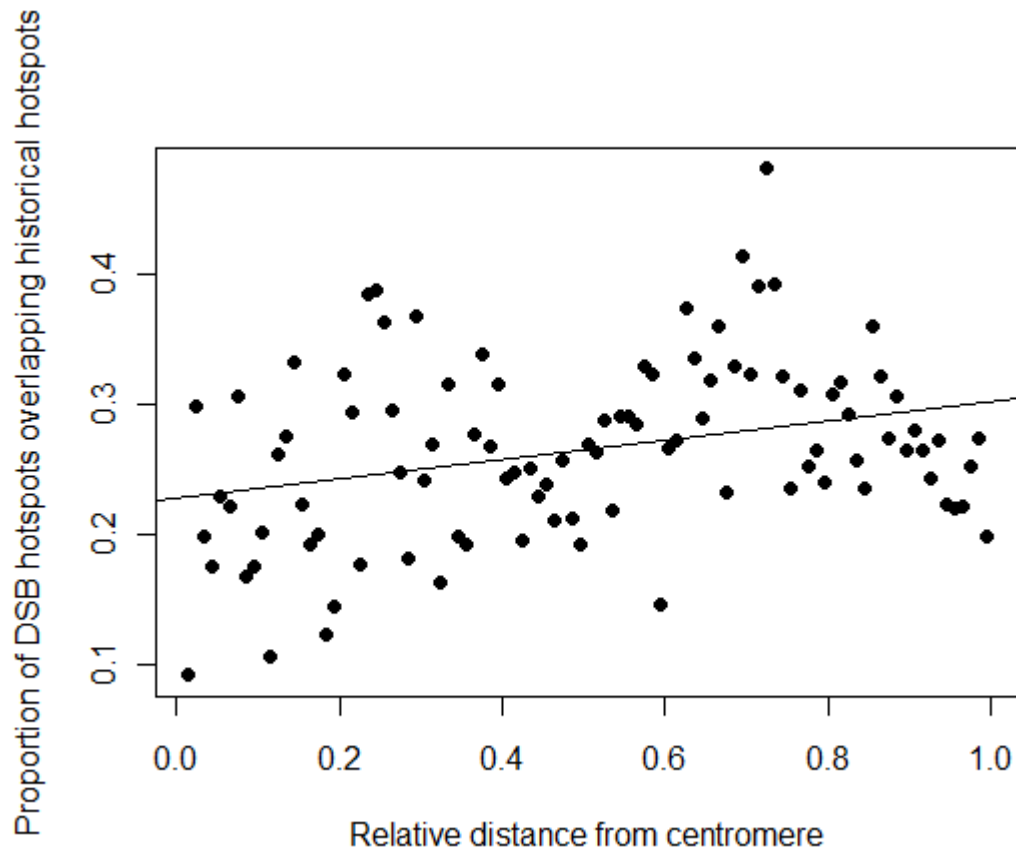

**Figure S9** The relationship between the relative distance from the centromere and the probability for DSB hotspots to overlapping historical hotspot. The relative distance from the centromere was calculated for each chromosome as the proportion of the chromosome length. DSB hotspots were divided into 100 bins based on the relative distance from the centromere.
