# Supplementary material
Source: PubMed Central journal article supplement (PMC3389972)
Supplement: supp_112.141036_FigureS10.pdf [file supp_112.141036_FigureS10.pdf]

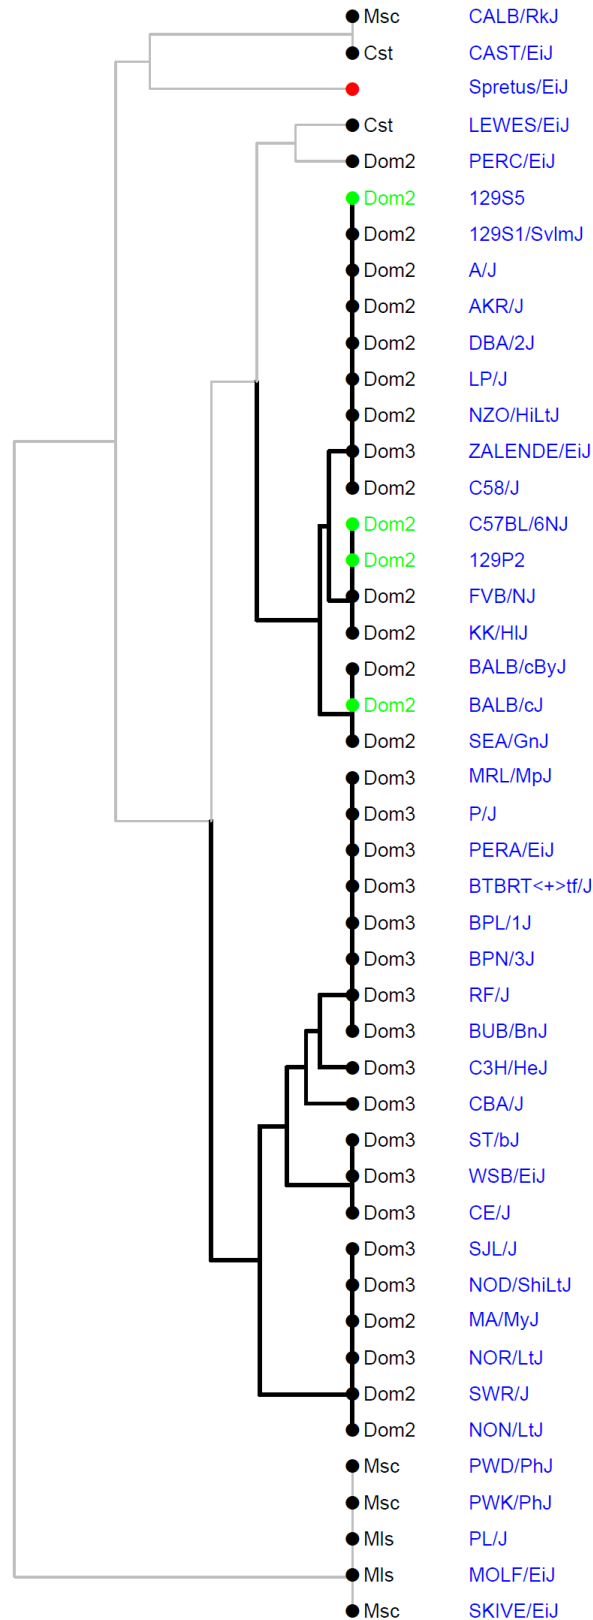

**Figure S10** *Prdm9* alleles in 95 mouse inbred strains (Cst, Dom2, Dom3, Msc, Mls). *Prdm9* alleles were genotyped or imputed using SNPs in a 5kb window surrounding the *Prdm9* gene. Next to each strain (names in blue) is the group assignment. The group assignments for strains which have been sequenced at *Prdm9* are shown in black. Imputed genotypes are shown in green. Imputation for one strain was unsuccessful (red bullet). The two largest clusters are Dom2 and Dom3 (shown in bold lines).
