# Supplementary material
Source: PubMed Central journal article supplement (PMC3389972)
Supplement: supp_112.141036_TableS3.pdf [file supp_112.141036_TableS3.pdf]

**Table S3 Individual repeats and repeat families that are significantly enriched in hotspots.**

|                           | Hotspots | Coldspots | P-value* | Relative Risk |
|---------------------------|----------|-----------|----------|---------------|
| <b>Repeat Family</b>      |          |           |          |               |
| Simple_repeat             | 20025    | 18157     | 6.33E-20 | 1.103         |
| Low_complexity            | 10146    | 9562      | 0.00171  | 1.061         |
| L1                        | 12842    | 12285     | 0.0235   | 1.045         |
| <b>Individual Repeats</b> |          |           |          |               |
| L1Md_F2                   | 1739     | 1138      | 3.35E-26 | 1.528         |
| MTA_Mm                    | 616      | 366       | 1.52E-12 | 1.683         |
| L1Md_T                    | 501      | 290       | 6.55E-11 | 1.728         |
| GC_rich                   | 335      | 186       | 7.45E-08 | 1.801         |
| GA-rich                   | 1757     | 1399      | 2.23E-07 | 1.256         |
| L1Md_F3                   | 453      | 291       | 3.48E-06 | 1.557         |
| L1Md_A                    | 350      | 211       | 5.31E-06 | 1.659         |
| MTA_Mm-int                | 122      | 51        | 7.58E-05 | 2.392         |
| L1_Mus1                   | 794      | 595       | 0.000115 | 1.334         |
| L1Md_F                    | 128      | 62        | 0.00214  | 2.065         |
| B1_Mus2                   | 2520     | 2202      | 0.00439  | 1.144         |
| <b>Simple Repeats</b>     |          |           |          |               |
| (GA)n                     | 2942     | 1780      | 1.24E-61 | 1.653         |
| (TC)n                     | 2858     | 1764      | 1.20E-55 | 1.62          |
| (TA)n                     | 2916     | 1829      | 1.98E-53 | 1.594         |
| (CA)n                     | 5986     | 5114      | 1.48E-13 | 1.171         |
| (GAAA)n                   | 715      | 452       | 1.50E-11 | 1.582         |
| (TG)n                     | 5961     | 5153      | 2.10E-11 | 1.157         |
| (T)n                      | 1283     | 948       | 1.56E-09 | 1.353         |
| (TTTC)n                   | 672      | 442       | 6.44E-09 | 1.52          |
| (A)n                      | 1302     | 977       | 1.18E-08 | 1.333         |
| (GGAA)n                   | 434      | 272       | 1.3E-06  | 1.596         |
| (TCTA)n                   | 660      | 467       | 0.000011 | 1.413         |
| (GAA)n                    | 304      | 189       | 0.00028  | 1.608         |
| (TTTTTC)n                 | 234      | 137       | 0.000603 | 1.708         |

P-value corrected using Bonferroni correction
