# Supplementary material
Source: PubMed Central journal article supplement (PMC3389972)
Supplement: supp_112.141036_TableS4.pdf [file supp_112.141036_TableS4.pdf]

**Table S4 List of strains from different sources and their known Prdm9 alleles.**

| Original 17  | Sequenced in this study | Sequenced by Parvanov <sup>S4</sup> | Combined |
|--------------|-------------------------|-------------------------------------|----------|
| 129P2/OlaHsd |                         |                                     | NA       |
| 129S1/SvImJ  |                         | 129S1/SvImJ                         | Dom2     |
| 129S5SvEvBrd |                         |                                     | NA       |
| A/J          |                         | A/J                                 | Dom2     |
| AKR/J        |                         | AKR/J                               | Dom2     |
| BALB/cJ      |                         |                                     | NA       |
| C3H/HeJ      |                         | C3H/HeJ                             | Dom3     |
| C57BL/6NJ    |                         |                                     | NA       |
| CAST/EiJ     |                         | CAST/EiJ                            | Cst      |
| CBA/J        | CBA/J                   | CBA/CaJ                             | Dom3     |
| DBA/J        | DBA/2J                  | DBA/2J                              | Dom2     |
| LP/J         | LP/J                    |                                     | Dom2     |
| NOD/ShiLtJ   | NOD/LtJ                 | NOD/LtJ                             | Dom3     |
| NZO/HILtJ    | NZO/HILtJ               | NZO/HILtJ                           | Dom2     |
| PWK/PhJ      |                         | PWK/PhJ                             | Msc      |
| SPRET/EiJ    |                         |                                     | NA       |
| WSB/EiJ      |                         | WSB/EiJ                             | Dom3     |
|              | SJL/J                   |                                     | Dom3     |
|              | CALB/RkJ                |                                     | Msc      |
|              | ST/bJ                   |                                     | Dom3     |
|              | P/J                     |                                     | Dom3     |
|              | PERC/EiJ                |                                     | Dom2     |
|              | CE/J                    |                                     | Dom3     |
|              | MRL/MpJ                 |                                     | Dom3     |
|              | PERA/EiJ                | PERA/EiJ                            | Dom3     |
|              | ZALENDE/EiJ             |                                     | Dom3     |
|              | BTBRT<+>tf/J            |                                     | Dom3     |
|              | C58/J                   |                                     | Dom2     |
|              | BPL/1J                  |                                     | Dom3     |
|              | BPN/3J                  |                                     | Dom3     |
|              | PL/J                    |                                     | Mls      |
|              | MA/MyJ                  |                                     | Dom2     |
|              | RF/J                    |                                     | Dom3     |
|              | FVB/NJ                  | FVB/NJ                              | Dom2     |
|              | SKIVE/EiJ               | SKIVE/EiJ                           | Msc      |
|              | KK/HiJ                  | KK/HiJ                              | Dom2     |
|              | NOR/LtJ                 |                                     | Dom3     |
|              | SWR/J                   |                                     | Dom2     |
|              | NON/LtJ                 |                                     | Dom2     |
|              | LEWES/EiJ               |                                     | Cst      |
|              | SEA/GnJ                 |                                     | Dom2     |
|              | BuB/BnJ                 |                                     | Dom3     |
|              |                         | PWD/PhJ                             | Msc      |
|              |                         | BALB/cByJ                           | Dom2     |
|              |                         | MOLF/EiJ                            | Mls      |

NA = Unkown Prdm9 allele

#### SUPPORTING REFERENCES

- S1. Cox A. et al., *Genetics* **182**, 1335-1344 (2009).
- S2. Paigen K. et al., *PLoS Biology* **7**(2), 340-349 (2009).
- S3. Billings T. et al., *PLoS One* **5**(12), e15340 (2010).
- S4. Parvanov, E.D., P.M. Petkov, and K. Paigen. *Science* **327**: 835 (2010).
